# Supplementary material for: Ultra-Flexible and Large-Area Textile-Based Triboelectric Nanogenerators with a Sandpaper-Induced Surface Microstructure
Source: MDPI journal article supplement (doi:10.3390/ma11112120), 2018-10-29
Supplement: s1 [file s1]

Supplementary information

# Ultra-Flexible and Large-Area Textile-Based Triboelectric Nanogenerators with a Sandpaper-Induced Surface Microstructure

Jian Song <sup>1,2,3,†</sup>, Libo Gao <sup>3,†</sup>, Xiaoming Tao <sup>2</sup> and Lixiao Li <sup>1,\*</sup>

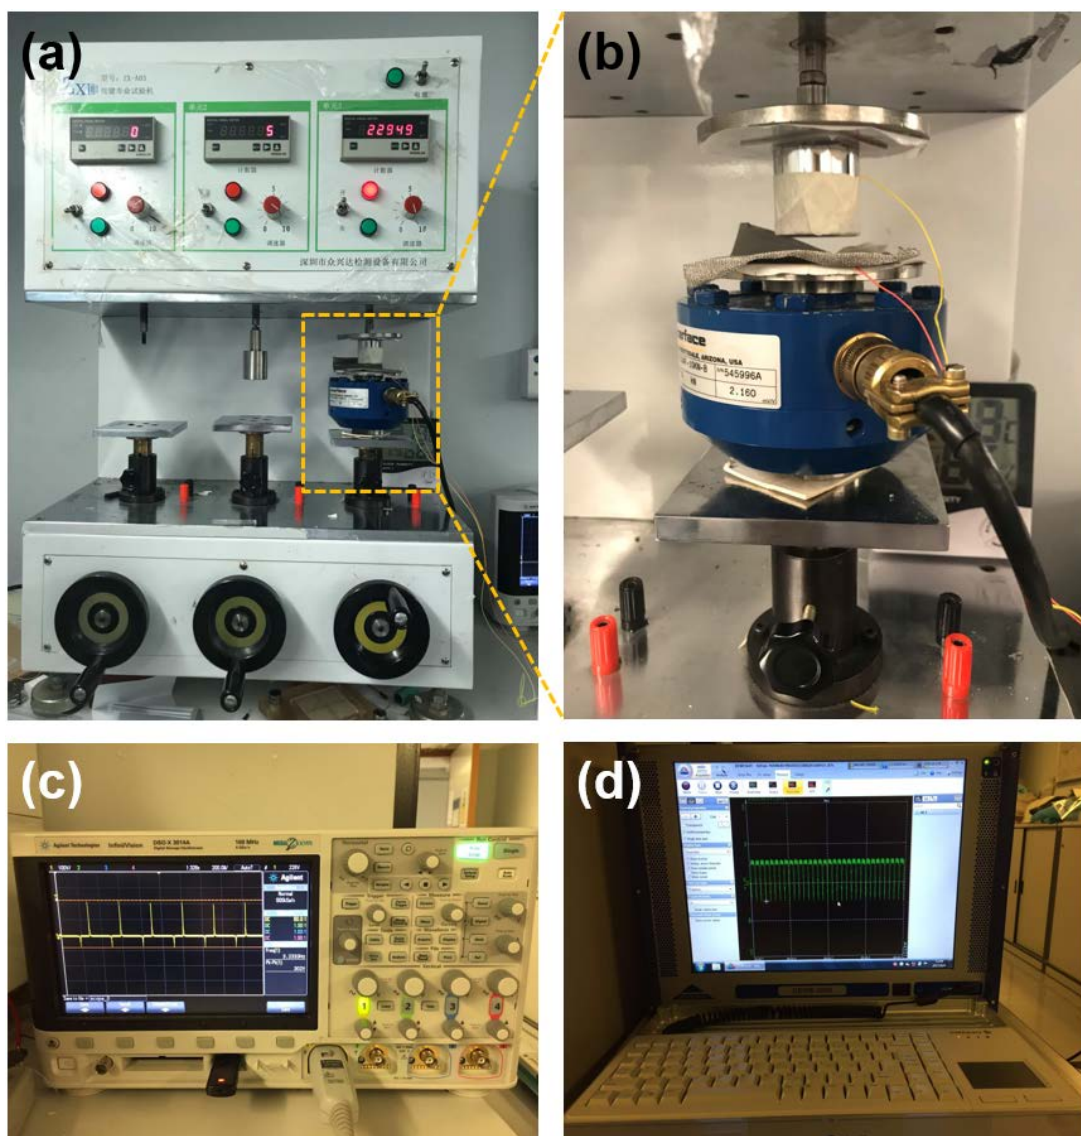

**Figure S1.** Experimental setup. (a) Keyboard life tester (ZXA-03). (b) Magnified image of cyclic compression element and T-TENG. (c) Keisight DSO-X3014A oscilloscope and N2790A high voltage probe with 8 MΩ internal resistance. (d) Load supervisor system (Dewe-2600 DAQ system).

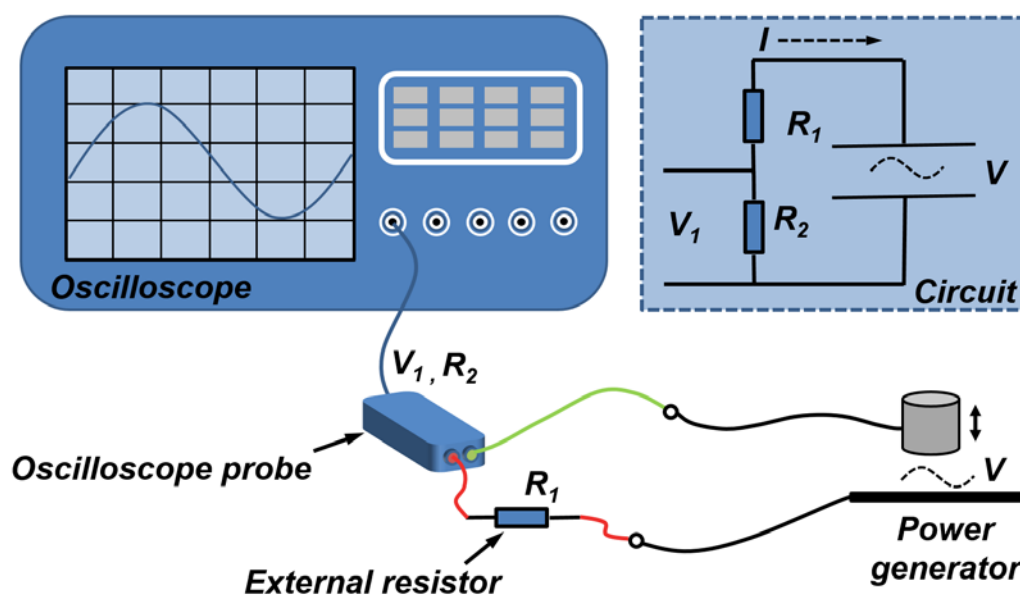

**Figure S2.** Schematic illustration of measurement circuit. Note: the output voltage is not entirely the case of open-circuit or short-circuit, owing to the existence of an  $8\text{ M}\Omega$  ( $R_2$ ) built-in resistor.

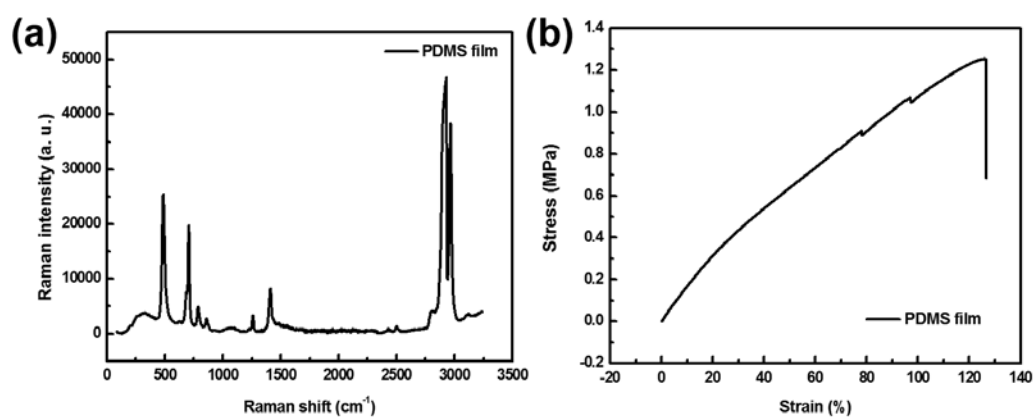

**Figure S3.** (a) Raman spectrum of PDMS film. (b) Stress vs. strain curve.
